# Supplementary material
Source: PubMed Central journal article supplement (PMC4537821)

**A**

| Rank | cRSS         | Coding flank | Heptamer | Spacer                  | Nonamer            | RIC Score |
|------|--------------|--------------|----------|-------------------------|--------------------|-----------|
| 1    | Cd8a_12      | tacagggact   | CACAATG  | AGTCAAAGTACA            | GAGAATACC          | -25.19    |
|      | Cd8a_23      | caaaacttcc   | CACAGTG  | ACACACCTTCTCCAACAGAAAAA | CCACACCCC          | -47.17    |
| 15   | Rag1_12      | gagaaagaga   | CACAGAG  | AGACAGACAGAA            | ACAGAAAGA          | -28.97    |
|      | Rag1_23      | actttataca   | CACAGAA  | ATACAGGAATTCTAGAAATCTGT | GCACTAAAA          | -48.53    |
| 70   | Ets2_12      | gcttggtaca   | CACAGTG  | ATCTCTTGAAGT            | TCAGATACC          | -29.34    |
|      | Ets2_23      | actccacaca   | CACACAC  | ATACACACACACACCCCCCCCAC | ACACACACC          | -48.44    |
| 101  | Bcl11b_12    | attaatctca   | CACAGTG  | ATCAGACCCATT            | CTTACAACA          | -31.48    |
|      | Bcl11b_23a   | cagacacaca   | CACACAC  | ATGCACACACATTACATGCCAG  | CCCATATCC          | -55.22    |
|      | Bcl11b_23b   | agaagggaca   | CACAGAC  | ACACAGACACACACACACATG   | CACACACAT          | -69.45    |
|      | Bcl11b_23c   | gaaatgaaac   | CACAGCC  | TTTGGTGTGTCTCTGAGAGCCTC | TCCCTGAGC          | -65.28    |
|      | Bcl11b_23d   | ggaacccag    | CACTGCA  | GTGTATAAACAGTATTGGAGAC  | CTTCAAACC          | -63.34    |
| 846  | Notch1_12    | gaggatgccc   | CACCTCA  | CCACATTCCCTTG           | ACATGAAGG          | -41.19    |
|      | Notch1_23    | cccaagccta   | CACAGTG  | ACACTGGACCCCTCTATGGATTG | GCTATAAAG          | -68.39    |
| n/a  | Lmo2_12      | atgtaacaca   | CACAGTA  | TTGTCTTACCCA            | GCAATAATT          | -39.04    |
| n/a  | Ttg1_23      | cttgagctca   | CACAGTG  | GCTCACCACCCACACAGCCCTC  | ACTCTGGCA          | -52.64    |
| n/a  | Ttg1_23*     | cttgagctca   | CACAGTG  | GCTCACCACCCACACAGCCCTC  | ACTCT <u>A</u> ACA | -49.42    |
| n/a  | Consensus_12 | gcctgtctta   | CACAGTG  | GTAGTAGGCTGT            | ACAAAAACC          | -23.00    |
| n/a  | Consensus_23 | gcctgtctta   | CACAGTG  | GTAGTACTCCACTGTCTGGCTGT | ACAAAAACC          | -26.70    |

**B**

**Notch1 deletions**

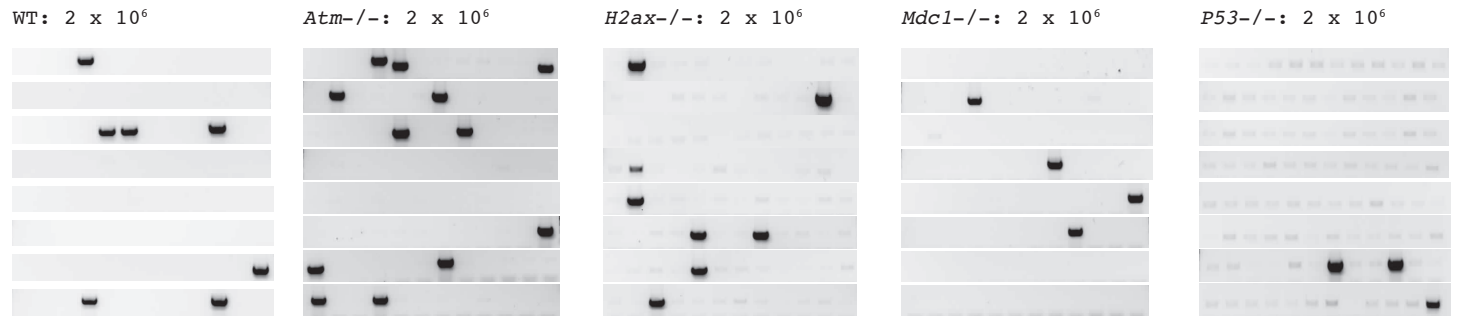

**C**

**Bcl11b deletions**

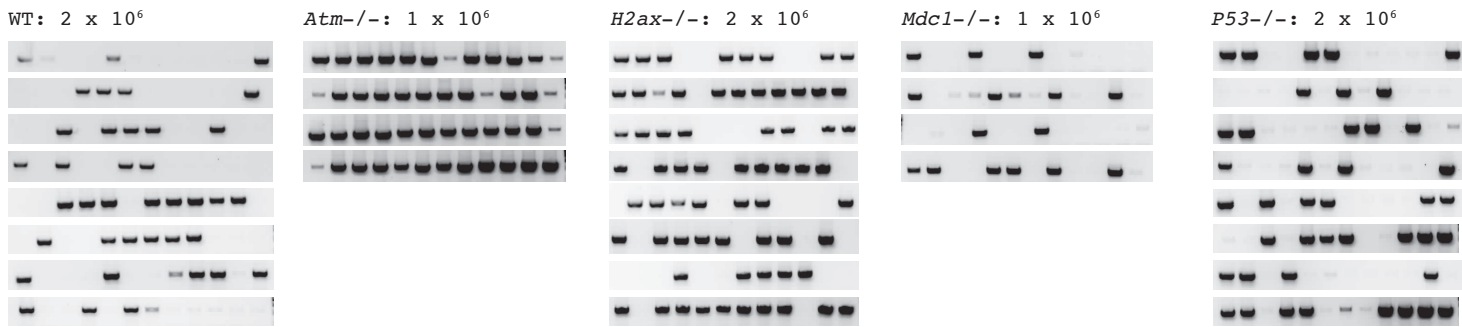

**D**

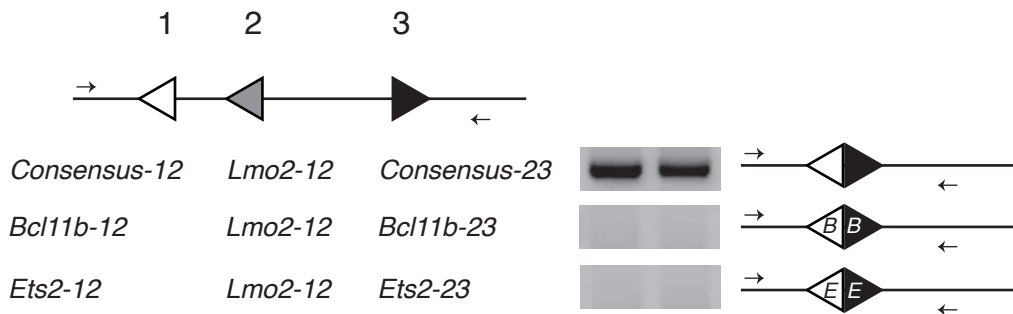

Supplement: NIHMS707494-supplement-4.pdf [file NIHMS707494-supplement-4.pdf]
