# Supplementary material
Source: PubMed Central journal article supplement (PMC4537821)

**A**

CD79b agagatgaccCACAGTGGGACAGAGGGAGTTAGAAACA -302 bp- CTGTCTGCTTCTTGCTGCTCCTCTAACTGTCTGTGcccagtttgc  
 CD79b-RSS ki gcctgtcttaCACAGTGGTAGTAGGCTGTACAAAAACC -302 bp- GGTTTTGTACAGCCAGACAGTGGAGTACTACCCTGTGtaagacaggg  
 CD79b-Notch1 cRSS ki gaggatgcccCACCTCACCACATTCCTTGACATGAAGG -302 bp- CTTTATAGCCAATCCATAGAGGGGTCCAGTGTCACTGTGtaggcttggg  
 CD79b-Bcl11b cRSS ki attaattctcaCACAGTGATCACAGCCATTCTTACAACA -302 bp- GGATATGGGCTGGGCATGTAATGTGTGTGCATGTGTGTGtgtgtctgc

E1 tgcaacaacCACAGCCAGGGACATCTTTGACTCAGCC -448 bp- CCGCATCTTTTCTCCTTCATTTTCATTATACCACACTGaatcgtccgt  
 E1-RSSki gcctgtcttaCACAGTGGTAGTAGGCTGTACAAAAACC -448 bp- GGTTTTGTACAGCCAGACAGTGGAGTACTACCCTGTGtaagacaggg  
 E1-Notch1 cRSS ki gaggatgcccCACCTCACCACATTCCTTGACATGAAGG -448 bp- CTTTATAGCCAATCCATAGAGGGGTCCAGTGTCACTGTGtaggcttggg  
 E1-Bcl11b cRSS ki attaattctcaCACAGTGATCACAGCCATTCTTACAACA -448 bp- GGATATGGGCTGGGCATGTAATGTGTGTGCATGTGTGTGtgtgtctgc

**B**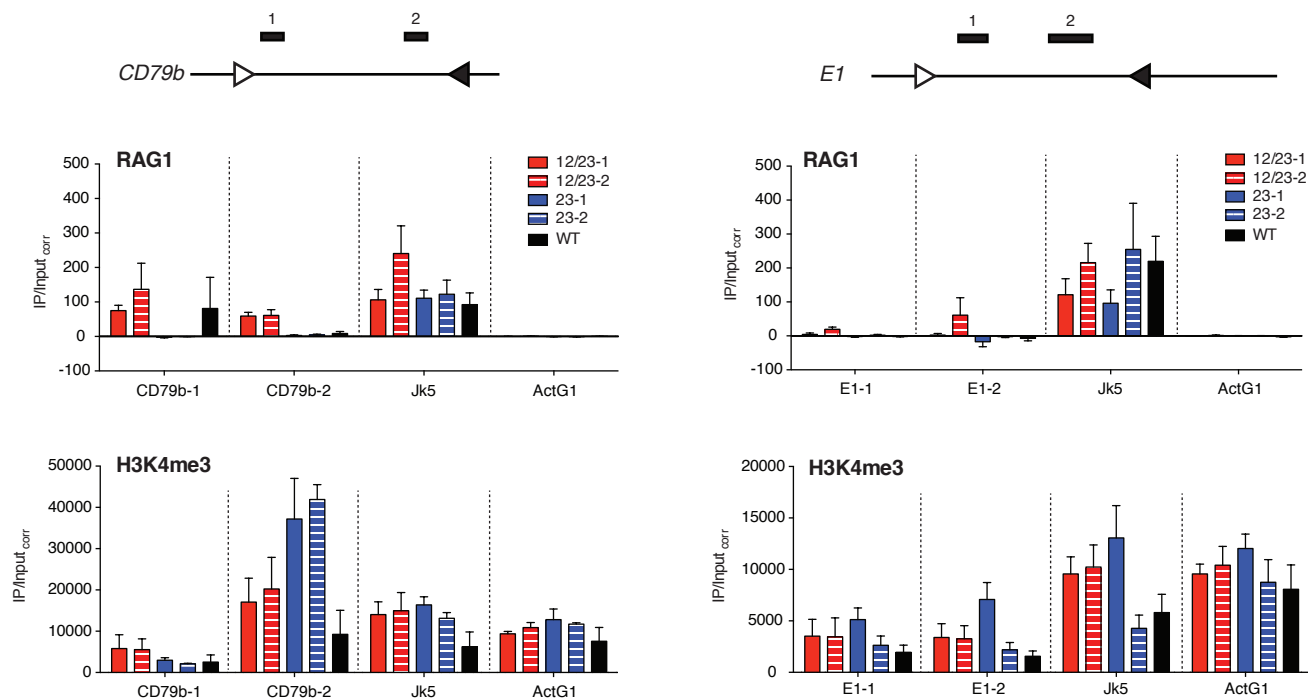**C**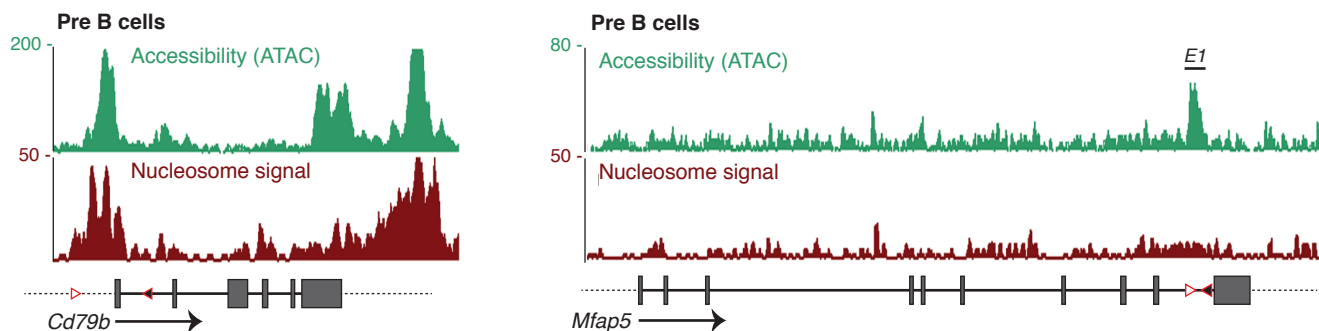

Supplement: NIHMS707494-supplement-6.pdf [file NIHMS707494-supplement-6.pdf]
