# Supplementary material
Source: PubMed Central journal article supplement (PMC4537821)
Supplement: NIHMS707494-supplement-7.pdf [file NIHMS707494-supplement-7.pdf]

**A** CD79b, *Atm*<sup>-/-</sup>

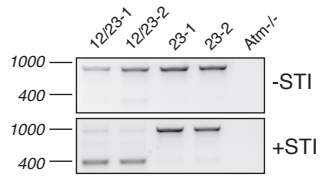

**B**

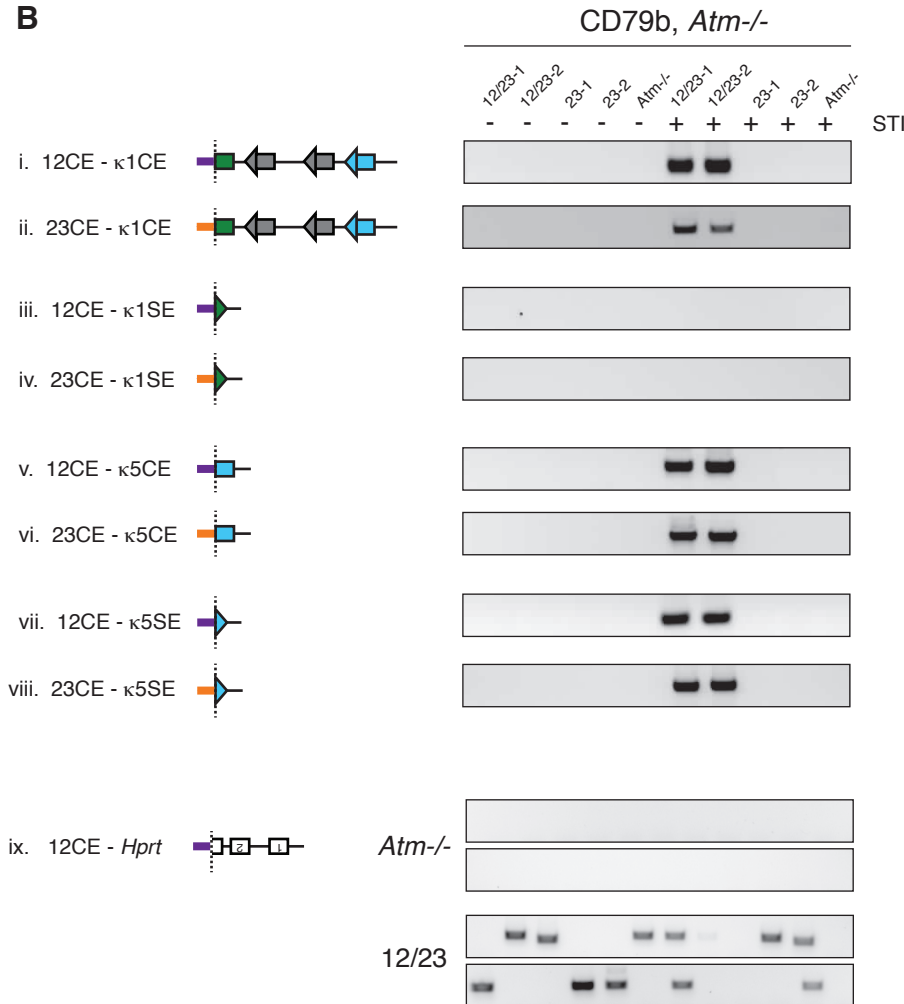

**C**

| <i>Atm</i> <sup>-/-</sup> cell line | Genomes tested | CJs detected |
|-------------------------------------|----------------|--------------|
| CD79b Notch1 cRSSki (1)             | 970,000        | 0            |
| CD79b Notch1 cRSSki (2)             | 970,000        | 0            |
| CD79b Bcl11b cRSSki (1)             | 970,000        | 0            |
| CD79b Bcl11bcRSSki (2)              | 970,000        | 0            |
| E1-Notch1 cRSSki (1)                | 960,000        | 0            |
| E1-Notch1 cRSSki (2)                | 970,000        | 0            |
| E1-Bcl11b cRSSki (1)                | 970,000        | 0            |
| E1-Bcl11b cRSSki (2)                | 960,000        | 0            |
