# Supplementary material
Source: PubMed Central journal article supplement (PMC4537821)

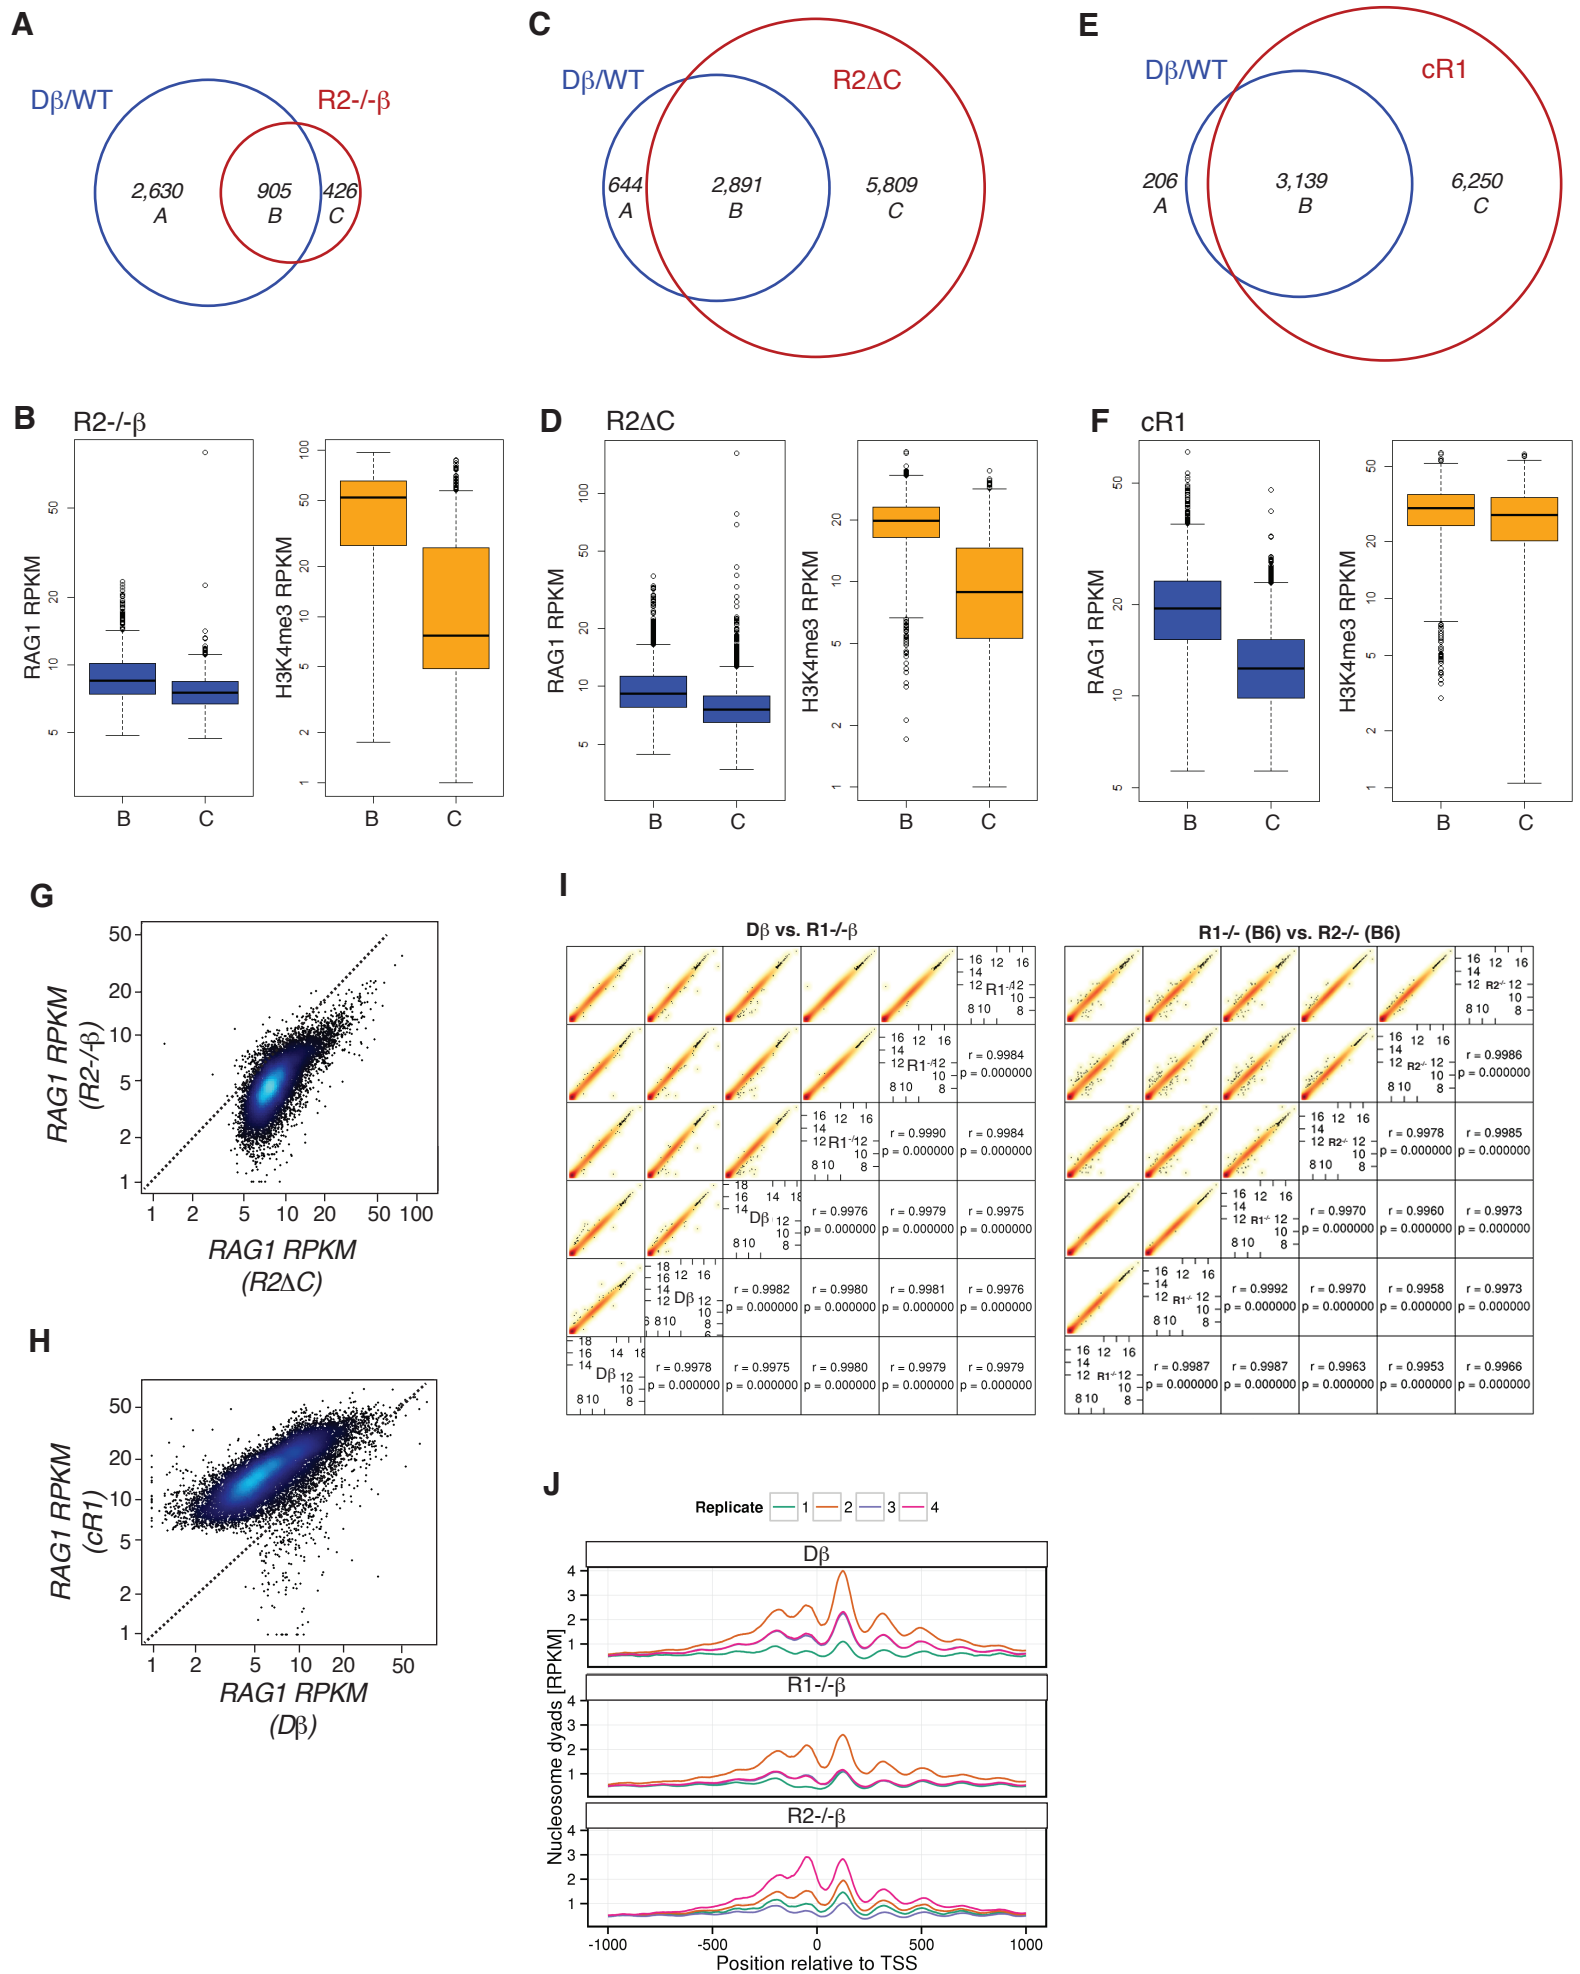

Supplement: NIHMS707494-supplement-3.pdf [file NIHMS707494-supplement-3.pdf]

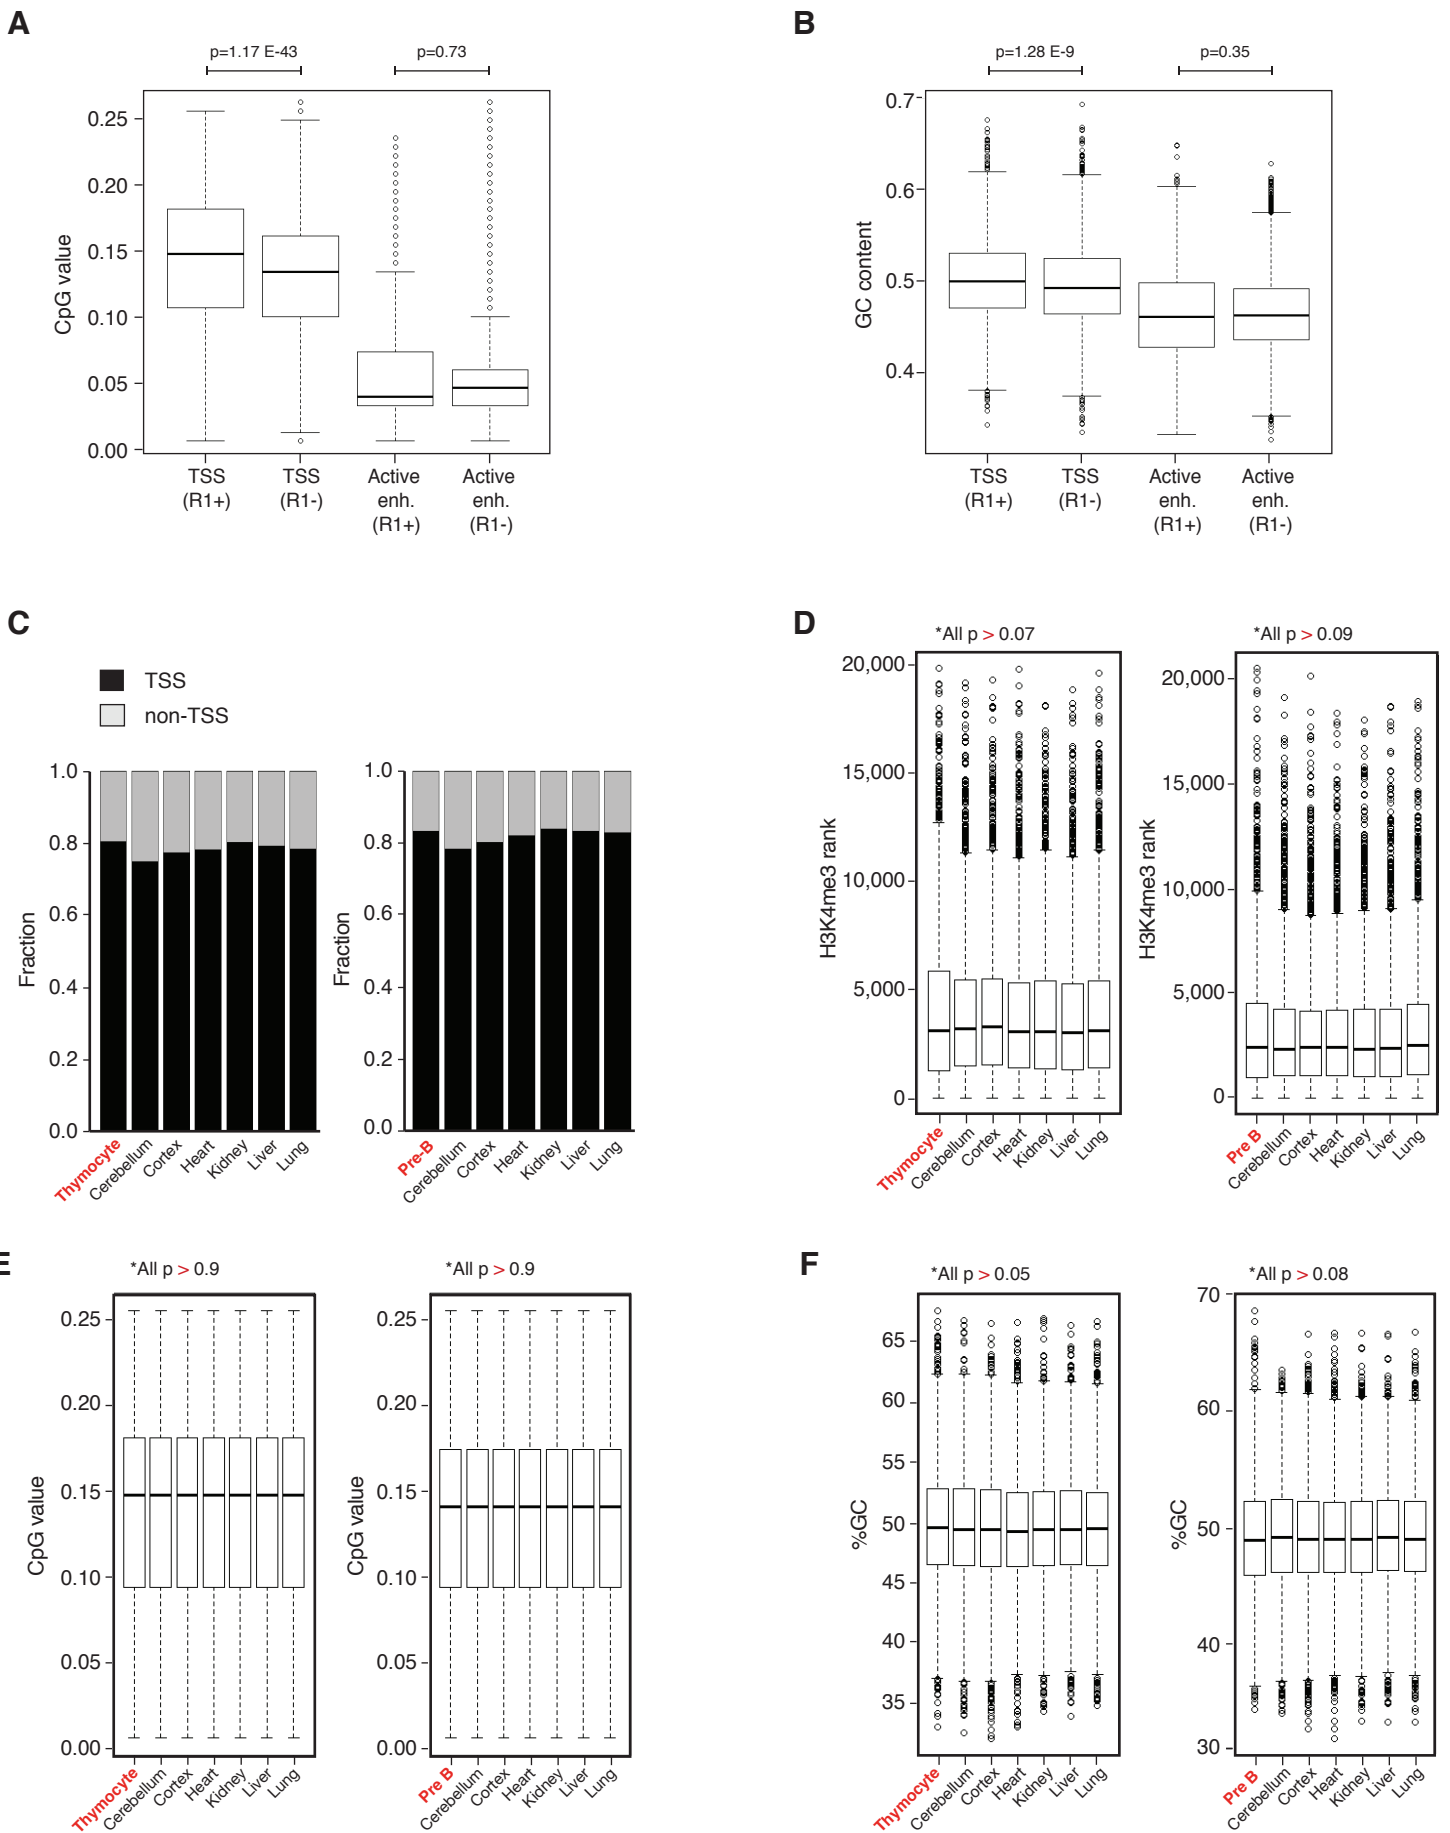

Supplement: NIHMS707494-supplement-5.pdf [file NIHMS707494-supplement-5.pdf]
